# Supplementary material
Source: publisher figshare collection journal article supplement (https://sage.figshare.com/ndownloader/files/17505683)
Supplement: Supplementary file 1 [file 17505683]

Author Response 2:

Thank you for the comments from a reviewer. We have now corrected the typo and referenced the statement as requested. The final sentence of the HS+HA section follows:

"Although more studies are needed to know the factors determining tolerance in these patients, it is likely that older age and worse lung function contribute to decreased tolerability.<sup>65,66</sup>"
